# Supplementary material for: Nordic Seas Deep-Water susceptible to enhanced freshwater export to the subpolar North Atlantic during peak MIS 11
Source: Copernicus journal article supplement (doi:10.5194/cp-2023-101), 2024-01-04
Supplement: Supplementary file 1 [file cp-2023-101-supplement.pdf]

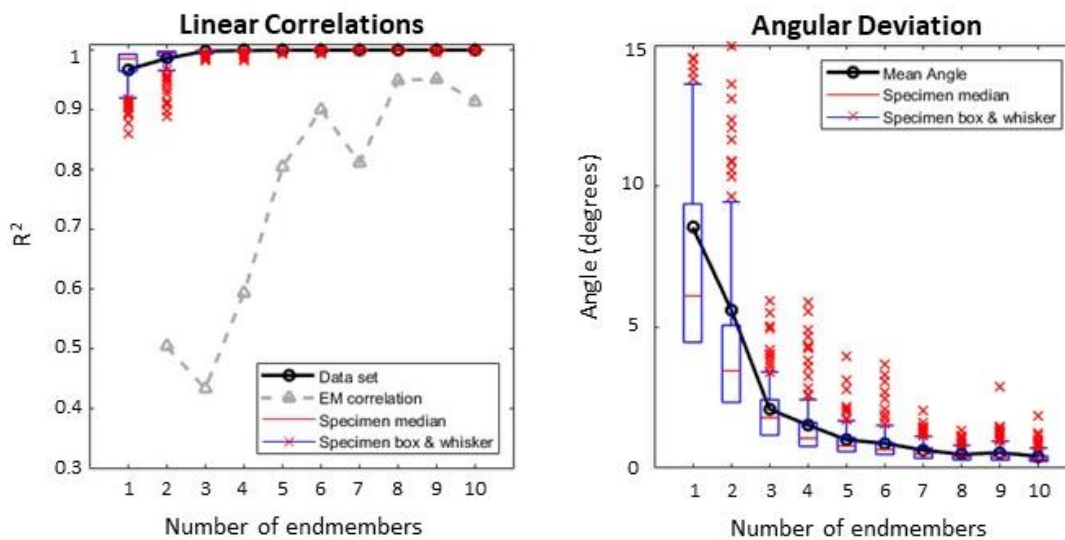

5 **Supplement Figure S1 | Goodness-of-fit assessment for non-parametric EMA.** Left: Linear correlations between endmembers and Right: Angular deviation ( $\theta$ ) parameters as a function of the number of fitted end members. Both indicate that three end members are sufficient to describe this data set.

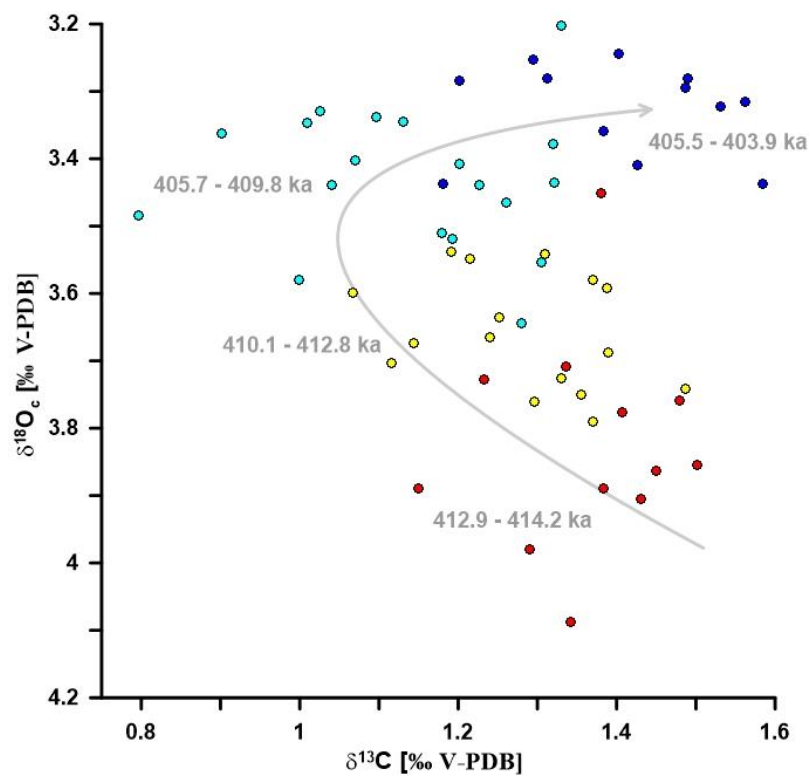

10 **Supplement Figure S2 |  $\delta^{18}\text{O}_c$  versus  $\delta^{13}\text{C}$  cross plots for the dataset.** Red symbols represent the interval 412.9-414.2 ka, yellow symbols represent the interval 410.1-412.8 ka, light blue symbols represent the interval 405.7-409.8 ka, and dark blue symbols represent the interval 403.9-405.5 ka.
